# Supplementary material for: Src/lck inhibitor dasatinib reversibly switches off cytokine release and T cell cytotoxicity following stimulation with T cell bispecific antibodies
Source: PubMed Central journal article supplement — J Immunother Cancer. 2021 Jul 29;9(7):e002582. doi: 10.1136/jitc-2021-002582 (PMC8323395; doi:10.1136/jitc-2021-002582), 2021-07-29
Supplement: jitc-2021-002582supp003.pdf [file jitc-2021-002582supp003.pdf]

**Title:** The Src/lck inhibitor dasatinib reversibly switches off cytokine release and T cell cytotoxicity following stimulation with T cell bispecific antibodies

**Authors:** G. Leclercq, H. Haegel, A. Schneider, A. Giusti, E. Marrer-Berger, C. Boetsch, A. Walz, V. Pulko, J. Sam, J. Challier, C. Ferlini, A. Odermatt, P. Umaña, M. Bacac, C. Klein

**Correspondance:** gabrielle.leclercq@roche.com

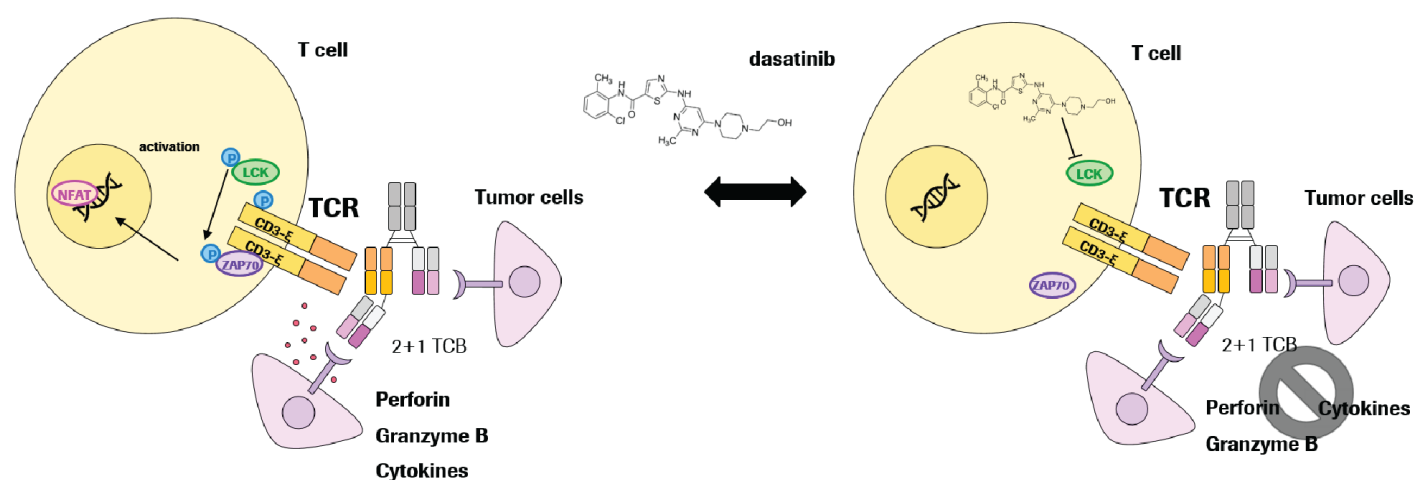

**In brief:** Dasatinib reversibly switches off T cell activation and proliferation, T cell cytotoxicity and cytokine release upon stimulation with T cell bispecific antibodies.
